# Supplementary material for: Detection and Genomic Characterization of Canine Circovirus in Iran
Source: MDPI journal article supplement (doi:10.3390/ani12040507), 2022-02-17
Supplement: s1 [file s1]

**Table S1:** Nucleotide and amino acid observed capsid sequences of Iranian CaCVs compared to CaCVs selected from phylogenetic groups from Table 2. Non-synonymous mutations in Iranian CaCVs are bolded. Highlighted in grey putative genotype-specific aa residues [34].

|                    | Aa residue on capsid     | <b>13</b>                  | 23                         | <b>50</b>                  | 83                         | 103                        | 123                        | <b>148</b>                 | <b>178</b>                 | 231                        | 234                        |
|--------------------|--------------------------|----------------------------|----------------------------|----------------------------|----------------------------|----------------------------|----------------------------|----------------------------|----------------------------|----------------------------|----------------------------|
| Phylogenetic group | nt position              | 1890-1892                  | 1860-1862                  | 1779-1781                  | 1680-1682                  | 1620-1622                  | 1560-1562                  | 1485-1487                  | 1395-1387                  | 1236-1238                  | 1227-1229                  |
| 1                  | ITA/2013/dog/TE6685/1-13 | S<br>(GCT)                 | R<br>(CCT)                 | V<br>(TAC)                 | T<br>(AGT)                 | R<br>(CCT)                 | L<br>(AAG)                 | I<br>(TAT)                 | S<br>(CGA)                 | M<br>(CAT)                 | M<br>(CAT)                 |
| 2                  | CHN/2015/dog/WM48B6      | R<br>(TCT)                 | R<br>(TCT)                 | V<br>(CAC)                 | T<br>(CGT)                 | T<br>(CGT)                 | L<br>(CAA)                 | N<br>(ATT)                 | S<br>(ACT)                 | M<br>(CAT)                 | M<br>(CAT)                 |
| 3                  | CHN/2014/dog/JZ98        | R<br>(TCT)                 | R<br>(CCT)                 | V<br>(GAC)                 | T<br>(TGT)                 | R<br>(CCT)                 | L<br>(TAG)                 | T<br>(TGT)                 | A<br>(TGC)                 | M<br>(CAT)                 | M<br>(CAT)                 |
| 4                  | VNM/2017/dog/VN1         | R<br>(CCT)                 | R<br>(CCT)                 | V<br>(CAC)                 | A<br>(TGC)                 | R<br>(TCT)                 | L<br>(CAG)                 | I<br>(TAT)                 | S<br>(AGA)                 | M<br>(CAT)                 | M<br>(CAT)                 |
| 5                  | ITA/2017/wolf/449        | R<br>(CCG)                 | R<br>(CCT)                 | I<br>(TAT)                 | V<br>(TAC)                 | R<br>(CCT)                 | L<br>(AAG)                 | I<br>(TAT)                 | T<br>(TGT)                 | M<br>(CAT)                 | M<br>(CAT)                 |
| 6                  | IRN/2019/Dog/292         | S<br>(ACT)                 | R<br>(CCT)                 | V<br>(CAC)                 | T<br>(TGT)                 | R<br>(TCT)                 | L<br>(GAG)                 | <b>R</b><br>( <b>TCT</b> ) | S<br>(TGA)                 | M<br>(CAT)                 | M<br>(CAT)                 |
|                    | IRN/2019/Dog/298         | S<br>(ACT)                 | <b>K</b><br>( <b>CTT</b> ) | V<br>(CAC)                 | <b>I</b><br>( <b>TAT</b> ) | R<br>(TCT)                 | L<br>(GAG)                 | <b>R</b><br>( <b>TCT</b> ) | A<br>(TGT)                 | M<br>(CAT)                 | M<br>(CAT)                 |
|                    | IRN/2019/Dog/308         | <b>T</b><br>( <b>AGT</b> ) | R<br>(CCT)                 | V<br>(CAC)                 | T<br>(TGT)                 | R<br>(TCT)                 | <b>I</b><br>( <b>GAT</b> ) | <b>R</b><br>( <b>TCT</b> ) | <b>Q</b><br>( <b>TTG</b> ) | M<br>(CAT)                 | M<br>(CAT)                 |
|                    | IRN/2019/Dog/496         | <b>T</b><br>( <b>AGT</b> ) | R<br>(CCT)                 | V<br>(CAC)                 | T<br>(TGT)                 | R<br>(TCT)                 | L<br>(GAG)                 | <b>R</b><br>( <b>TCT</b> ) | T<br>(TGT)                 | M<br>(CAT)                 | M<br>(CAT)                 |
|                    | IRN/2019/Dog/497         | S<br>(ACT)                 | R<br>(CCT)                 | V<br>(CAC)                 | T<br>(TGT)                 | R<br>(TCT)                 | L<br>(GAG)                 | <b>R</b><br>( <b>TCT</b> ) | S<br>(TGA)                 | <b>I</b><br>( <b>TAT</b> ) | <b>L</b><br>( <b>CAG</b> ) |
|                    | IRN/2019/Dog/498         | <b>T</b><br>( <b>AGT</b> ) | R<br>(CCT)                 | <b>M</b><br>( <b>CAT</b> ) | T<br>(TGT)                 | <b>K</b><br>( <b>CTT</b> ) | L<br>(GAG)                 | <b>R</b><br>( <b>TCT</b> ) | A<br>(TGT)                 | M<br>(CAT)                 | M<br>(CAT)                 |
| UCD3-487           | USA/2011/dog/UCD3-478    | R<br>(CCG)                 | R<br>(TCT)                 | V<br>(TAC)                 | T<br>(TGT)                 | R<br>(CCT)                 | L<br>(AAG)                 | I<br>(TAT)                 | F<br>(AAA)                 | M<br>(CAT)                 | M<br>(CAT)                 |

**Table S2:** Nucleotide and amino acid observed replicase sequences of Iranian CaCVs compared to CaCVs selected from phylogenetic groups from Table 2. Non-synonymous mutations in Iranian CaCVs are bolded.

| Phylogenetic group | Aa residue on replicase  | 8                     | 10         | 32         | 37         | 55         | 69         | 72         | 73         | 75         | 76         | 77         | 78         | 106        | 132        | 140        | 142        | 150        | 174        | 257        | 269        | 282        | 300        |
|--------------------|--------------------------|-----------------------|------------|------------|------------|------------|------------|------------|------------|------------|------------|------------|------------|------------|------------|------------|------------|------------|------------|------------|------------|------------|------------|
|                    | nt position              | 22-24                 | 28-30      | 94-96      | 109-111    | 163-165    | 205-207    | 214-216    | 217-219    | 223-225    | 226-228    | 229-231    | 232-234    | 316-318    | 394-396    | 418-420    | 424-426    | 448-450    | 520-522    | 769-771    | 805-807    | 844-846    | 898-900    |
|                    |                          |                       |            |            |            |            |            |            |            |            |            |            |            |            |            |            |            |            |            |            |            |            |            |
| 1                  | ITA/2013/dog/TE6685/1-13 | Q<br>(CAG)            | V<br>(GTC) | E<br>(GAG) | V<br>(GTG) | E<br>(GAG) | K<br>(AAG) | R<br>(CGT) | M<br>(ATG) | A<br>(GCC) | L<br>(CTG) | K<br>(AAG) | A<br>(GCA) | V<br>(GTA) | T<br>(ACG) | S<br>(TCT) | F<br>(TTT) | S<br>(TCG) | E<br>(GAG) | N<br>(AAT) | S<br>(TCT) | K<br>(AAG) | M<br>(ATG) |
| 2                  | CHN/2015/dog/WM48B6      | Q<br>(CAG)            | G<br>(GGC) | A<br>(GCG) | V<br>(GTG) | E<br>(GAG) | N<br>(AAT) | R<br>(CGG) | M<br>(ATG) | A<br>(GCC) | L<br>(TTG) | K<br>(AAG) | A<br>(GCT) | L<br>(TTG) | T<br>(ACG) | S<br>(TCT) | Y<br>(TAT) | S<br>(TCG) | E<br>(GAA) | N<br>(AAT) | G<br>(GGG) | K<br>(AAG) | M<br>(ATG) |
| 3                  | CHN/2014/dog/JZ98        | Q<br>(CAG)            | G<br>(GGC) | E<br>(GAA) | V<br>(GTG) | E<br>(GAG) | N<br>(AAT) | R<br>(CGG) | M<br>(ATG) | A<br>(GCC) | I<br>(ATT) | K<br>(AAG) | A<br>(GCA) | I<br>(ATT) | T<br>(ACT) | A<br>(GCT) | Y<br>(TAT) | S<br>(TCG) | E<br>(GAG) | N<br>(AAT) | G<br>(GGG) | K<br>(AAA) | M<br>(ATG) |
| 4                  | VNM/2017/dog/VN_1        | Q<br>(CAG)            | V<br>(GTC) | E<br>(GAG) | V<br>(GTG) | E<br>(GAG) | K<br>(AAG) | R<br>(CGT) | M<br>(ATG) | A<br>(GCC) | L<br>(CTG) | K<br>(AAG) | A<br>(GCA) | I<br>(ATA) | T<br>(ACG) | A<br>(GCT) | Y<br>(TAT) | S<br>(TCG) | E<br>(GAA) | N<br>(AAT) | G<br>(GGG) | K<br>(AAA) | M<br>(ATG) |
| 5                  | ITA/2017/wolf/449        | Q<br>(CAA)            | V<br>(GTC) | A<br>(GCG) | V<br>(GTG) | E<br>(GAG) | K<br>(AAG) | R<br>(CGT) | M<br>(ATG) | A<br>(GCT) | L<br>(CTG) | K<br>(AAG) | A<br>(GCA) | I<br>(ATC) | T<br>(ACG) | A<br>(GCT) | H<br>(CAC) | S<br>(TCG) | N<br>(AAC) | N<br>(AAT) | G<br>(GGT) | T<br>(ACT) | R<br>(CGG) |
| 6                  | IRN/2019/Dog/292         | Q<br>(CAG)            | G<br>(GGC) | D<br>(GAT) | V<br>(GTG) | E<br>(GAG) | Q<br>(CAG) | R<br>(CGA) | M<br>(ATG) | I<br>(ATC) | L<br>(CTC) | K<br>(AAG) | A<br>(GCA) | I<br>(ATT) | T<br>(ACC) | A<br>(GCT) | Y<br>(TAT) | S<br>(TCG) | E<br>(GAA) | N<br>(AAT) | S<br>(AGT) | K<br>(AAA) | M<br>(ATG) |
|                    | IRN/2019/Dog/298         | K<br>(AAG)            | A<br>(GCC) | D<br>(GAT) | V<br>(GTG) | E<br>(GAG) | Q<br>(CAG) | R<br>(CGA) | M<br>(ATG) | A<br>(GCT) | I<br>(ATC) | K<br>(AAG) | A<br>(GCA) | I<br>(ATT) | T<br>(ACC) | A<br>(GCT) | Y<br>(TAT) | S<br>(TCG) | E<br>(GAA) | K<br>(AAG) | S<br>(TCA) | S<br>(AGT) | L<br>(CTG) |
|                    | IRN/2019/Dog/308         | Q<br>(CAG)            | V<br>(GTC) | D<br>(GAT) | V<br>(GTG) | A<br>(GCG) | Q<br>(CAG) | R<br>(CGA) | M<br>(ATG) | A<br>(GCT) | L<br>(CTG) | R<br>(AGA) | A<br>(GCA) | I<br>(ATT) | T<br>(ACC) | G<br>(GGT) | Y<br>(TAT) | A<br>(GCG) | E<br>(GAA) | N<br>(AAT) | C<br>(TGT) | K<br>(AAA) | M<br>(ATG) |
|                    | IRN/2019/Dog/496         | K<br>(AAG)            | A<br>(GCC) | E<br>(GAG) | V<br>(GTG) | E<br>(GAG) | R<br>(CGA) | R<br>(CGG) | M<br>(ATG) | A<br>(GCT) | I<br>(ATT) | K<br>(AAA) | G<br>(GGC) | I<br>(ATT) | T<br>(ACG) | A<br>(GCT) | Y<br>(TAT) | S<br>(TCG) | Q<br>(CAA) | N<br>(AAT) | S<br>(TCA) | S<br>(AGT) | L<br>(CTG) |
|                    | IRN/2019/Dog/497         | Q<br>(CAG)            | G<br>(GGC) | D<br>(GAT) | G<br>(GGG) | E<br>(GAG) | Q<br>(CAG) | R<br>(CGT) | M<br>(ATG) | A<br>(GCT) | L<br>(CTC) | K<br>(AAG) | A<br>(GCA) | L<br>(TTG) | S<br>(TCC) | A<br>(GCT) | F<br>(TTT) | S<br>(TCG) | Q<br>(CAA) | N<br>(AAT) | S<br>(AGT) | K<br>(AAA) | M<br>(ATG) |
|                    | IRN/2019/Dog/498         | K<br>(AAG)            | A<br>(GCC) | E<br>(GAG) | V<br>(GTG) | E<br>(GAG) | Q<br>(CAG) | Q<br>(CAG) | V<br>(GTG) | A<br>(GCG) | L<br>(CTA) | K<br>(AAG) | A<br>(GCA) | I<br>(ATT) | T<br>(ACG) | A<br>(GCT) | Y<br>(TAT) | S<br>(TCG) | Q<br>(CAA) | N<br>(AAT) | S<br>(TCA) | S<br>(AGT) | L<br>(CTG) |
|                    | UCD3-487                 | USA/2011/dog/UCD3-478 | H<br>(CAT) | V<br>(GTC) | E<br>(GAG) | V<br>(GTG) | E<br>(GAG) | K<br>(AAG) | R<br>(CGT) | M<br>(ATG) | A<br>(GCC) | L<br>(CTG) | K<br>(AAG) | A<br>(GCA) | I<br>(ATA) | T<br>(ACG) | A<br>(GCT) | H<br>(CAC) | S<br>(TCG) | H<br>(CAC) | N<br>(AAT) | S<br>(AGT) | T<br>(ACT) |
